# Supplementary figures and images for: Ingestion of xylooligosaccharides during the suckling period improve the feed efficiency and hindgut fermentation capacity of piglets after weaning
Source: Royal Society of Chemistry journal article supplement (doi:10.1039/d1fo02275j), 2021-01-01

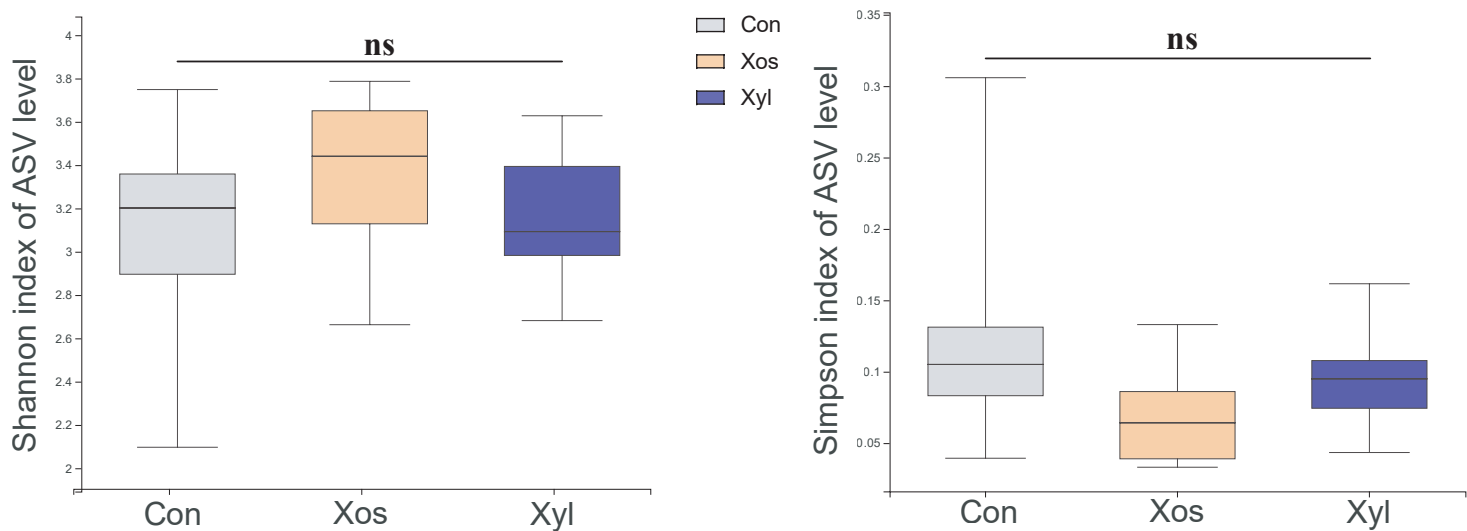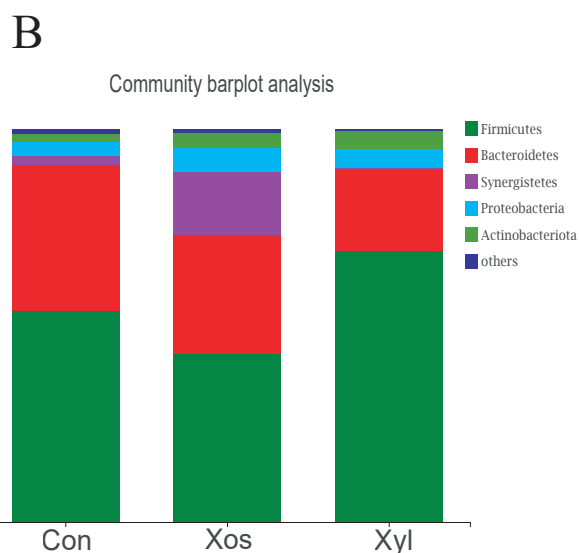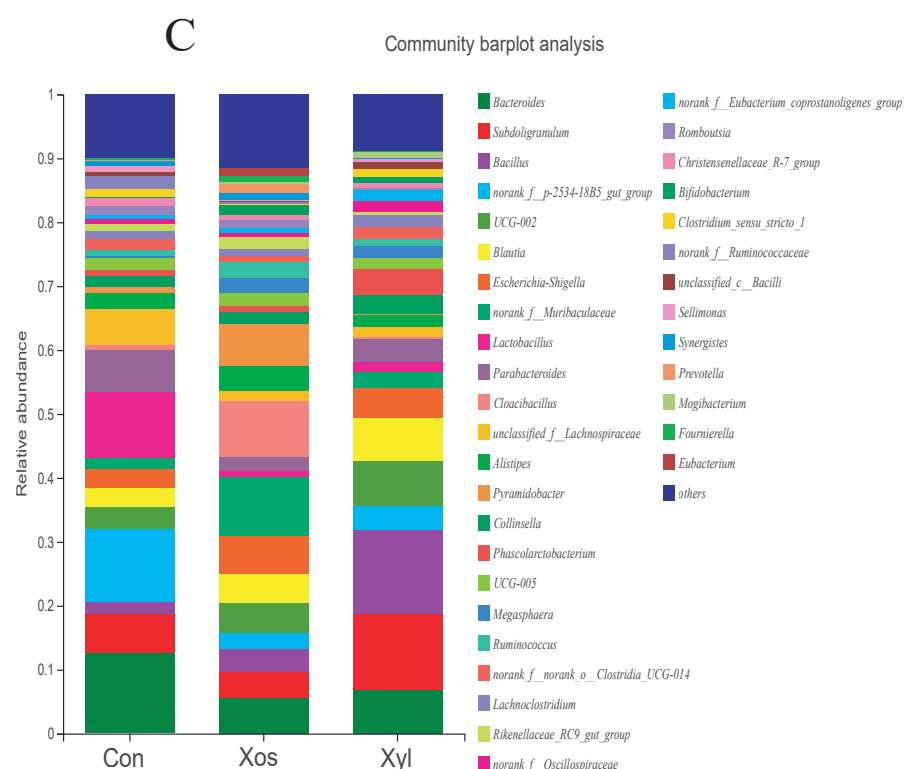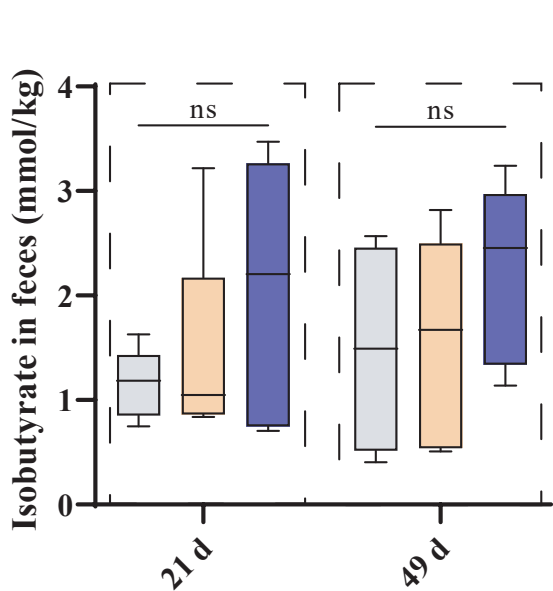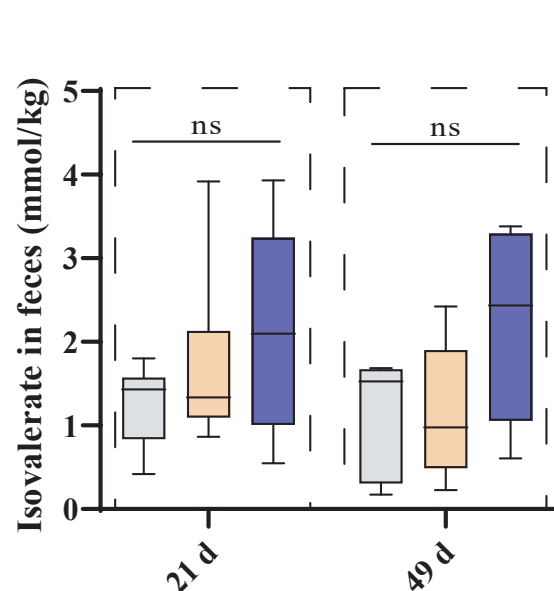

Supplement: d1fo02275j2.pdf [file d1fo02275j2.pdf]
